# Supplementary material for: Evaluating Changes in Cell-Wall Components Associated with Clubroot Resistance Using Fourier Transform Infrared Spectroscopy and RT-PCR
Source: PubMed Central journal article supplement (PMC5666740; doi:10.3390/ijms18102058), 2017-09-26
Supplement: ijms-18-02058-s001.pdf [file ijms-18-02058-s001.pdf]

**Table S1.** Spectral interpretation and assignment of canola root samples after multivariate analysis.

| <b>Wavenumber (cm<sup>-1</sup>)</b> | <b>Assignment</b>                                     | <b>Group</b>          |
|-------------------------------------|-------------------------------------------------------|-----------------------|
| 1655                                | C-N stretching amide I                                | Proteins              |
| 1578                                | N-H deformation amide II                              | Proteins              |
| 1553                                | N-H deformation amide II                              | Proteins              |
| 1542                                | N-H deformation amide II                              | Proteins              |
| 1520                                | Skeletal bands of aromatic rings                      | Lignin                |
| 1483                                | C-H bending in alkyl group                            | Proteins              |
| 1467                                | CH <sub>2</sub> bending of methylene chains in lignin | Lignin                |
| 1351                                | CH <sub>2</sub> bending                               | Xyloglucan, cellulose |
| 1275                                | C-O stretching                                        | Lignin, pectin        |
| 1261                                | C-O stretching                                        | Pectin                |
| 1250                                | C-O stretching                                        | Pectin/lignin         |

**Table S2.** Primer sequences used for quantitative real-time PCR analysis.

| <b>Gene Name</b> | <b>Accession No.</b> | <b>Forward</b>            | <b>Reverse</b>            | <b>Reference</b> |
|------------------|----------------------|---------------------------|---------------------------|------------------|
| <i>BrPAL1</i>    | DQ341309             | CAAAGCGATTACGGAGGTAA      | CGCTCCTTTGAAACCGTAGTC     | [58]             |
| <i>BrPAL2</i>    | AY795080             | TTGGATTACGGATTCAAAGGA     | CGAGATGAGTCCCAAAGAGTT     | [58]             |
| <i>BrPAL3</i>    | AY055752             | AGAACGGTGTGCGCTCTTCAG     | TGTGGCGGAGTGTGGTAATG      | [58]             |
| <i>BrC4H</i>     | DQ485129             | TGACTTTAAGTATGTGCCGTTG    | GGACCTTGGCTTCATTACGAT     | [58]             |
| <i>Br4CL</i>     | CX190902             | TAATCCGAATCTTTACTTCCACAG  | GCAACCGTCACTTTACACCTCT    | [58]             |
| <i>BrCCR</i>     | CD844319             | GGTGGAAGTTTAGGTCATTAGAAGA | CCAATAGTAGACTTGAGGAGGTGAA | [58]             |
| <i>BrCAD</i>     | CD814354             | TTATGTCCTGGTTGGTTTCCC     | CACCCTTCAATAGCTTCGTTT     | [58]             |
| <i>BrGST</i>     | AI352707             | GTGGCTGAGATCACCAAGAG      | TACTGCGACTGAAGCAGAAG      | This work        |
| <i>BrXTH</i>     | AY156708             | GTCCGCATGAAATGGACCATCTAC  | CCTTCTACATTCGGCTGGCATAAC  | This work        |
